# Supplementary material for: An ultrasensitive fluorescent aptasensor for detection of cancer marker proteins based on graphene oxide–ssDNA
Source: Royal Society of Chemistry journal article supplement (doi:10.1039/c8ra08078j), 2018-01-01
Supplement: c8ra08078j1.pdf [file c8ra08078j1.pdf]

## Supplementary Data for

### **An Ultrasensitive Fluorescent Aptasensor for Detection of Cancer Marker Protein Based on Graphene Oxide-ssDNA**

Chen-Feng Wang, Zhen-Guang Wang\*, Xin-Yue Sun, Meng-Jiao Chen, Yun-Kai Lv\*

*Key Laboratory of Analytical Science and Technology of Hebei Province, Key Laboratory of Medicinal Chemistry and Molecular Diagnosis of Ministry of Education & College of Chemistry and Environmental Science, Hebei University, Baoding 071002, China*

\*Corresponding author address

Prof. Yun-Kai Lv, College of Chemistry and Environmental Science, Hebei University, Baoding 071002, China. Tel. / Fax: +86-312-5079795. E-mail: lvyunkai@hbu.edu.cn (Y.-K. Lv).

Dr. Zhen-Guang Wang, College of Chemistry and Environmental Science, Hebei University, Baoding 071002, China. Tel. / Fax: +86-312-5079795. E-mail: wzg583@163.com (ZG Wang)

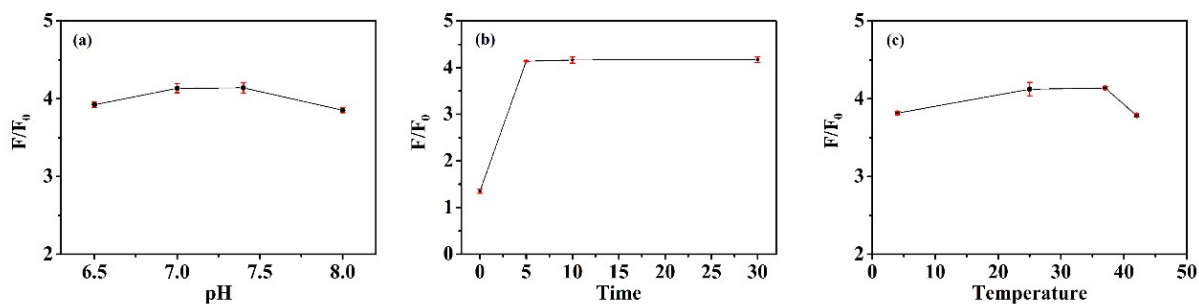

**Figure S1.** Optimization of condition of the fluorescent aptasensor.

(a) Effect of different pH on the  $F/F_0$  values. After 5 minutes of incubation in 37 °C, measured at room temperature. (b) Effect of different time on the  $F/F_0$  values. Incubation time is 5min, pH is 7.4. After incubation different time in pH 7.4 Buffer, measured at room temperature. (c) Effect of different incubation temperature on the  $F/F_0$  values. After incubation in pH 7.4 Buffer, measured at room temperature. Concentration of AFP was 50 pg/mL. The excitation and emission wavelengths were 488 nm and 520 nm.

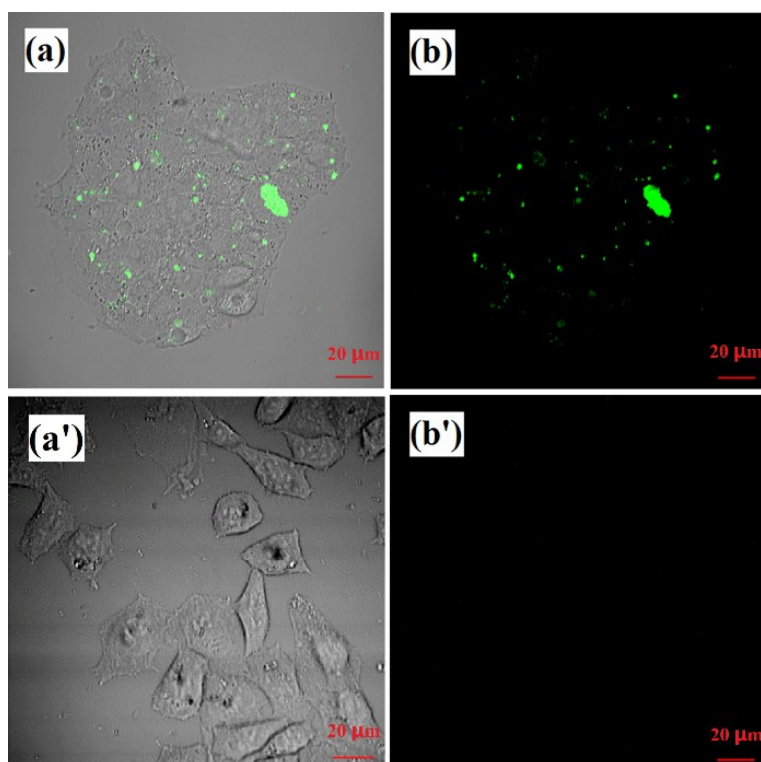

**Figure S2.** Specificity analysis of fluorescent probes in sensing platforms.

(a): fluorescence images of HepG2 in bright vision, (b): fluorescence images of HepG2 in dark vision, (a') fluorescence images of BT474 in bright vision, (b') fluorescence images of BT474 in dark vision. About 10  $\mu\text{g/mL}$  of FAM-ssDNA as the final concentration was used. The excitation and emission wavelengths are 488 nm and 520 nm.
